# Supplementary material for: Magnesium Hydroxide Nanoparticles Kill Exponentially Growing and Persister Escherichia coli Cells by Causing Physical Damage
Source: MDPI journal article supplement (doi:10.3390/nano11061584), 2021-06-16
Supplement: s1 [file s1]

## SUPPLEMENTARY MATERIALS

Article

# Magnesium Hydroxide Nanoparticles Kill Exponentially Growing and Persister *Escherichia coli* Cells by Causing Physical Damage

Yohei Nakamura <sup>1</sup>, Kaede Okita <sup>1</sup>, Daisuke Kudo <sup>2</sup>, Dao Nguyen Duy Phuong <sup>2</sup>, Yoshihito Iwamoto <sup>2</sup>, Yoshie Yoshioka <sup>1</sup>, Wataru Ariyoshi <sup>1</sup> and Ryota Yamasaki <sup>1,\*</sup>

<sup>1</sup> Department of Health Promotion, Division of Infections and Molecular Biology, Kyushu Dental University, Kitakyushu 803-8580, Fukuoka, Japan;  
r19nakamura@fa.kyu-dent.ac.jp (Y.N.); r19okita@fa.kyu-dent.ac.jp (K.O.);  
r16yoshioka@fa.kyu-dent.ac.jp (Y.Y.); arikichi@kyu-dent.ac.jp (W.A.)

<sup>2</sup> Kyowa Chemical Industry Co., Ltd., Hayashida-cho, Sakaide 762-0012, Kagawa, Japan;  
daisukekudo@kyowa-chem.co.jp (D.K.);  
daonguyenduyphuong@kyowa-chem.co.jp (D.N.D.P.);  
yoshihitoiwamoto@kyowa-chem.co.jp (Y.I.)

\* Correspondence: r18yamasaki@fa.kyu-dent.ac.jp; Tel.: +81-93-285-3051

**Table S1.** Data of XRD measurements. FWHM (full width at half maximum) indicates diffraction line width spread.

|       | FWHM<br>[°2Th.] | Crystalline size<br>[Å] | Crystal plane |
|-------|-----------------|-------------------------|---------------|
| NM80  | 0.830           | 97                      | (001)         |
|       | 0.520           | 161                     | (101)         |
|       | 0.190           | 479                     | (110)         |
| NM300 | 0.235           | 342                     | (001)         |
|       | 0.199           | 423                     | (101)         |
|       | 0.150           | 607                     | (110)         |
| NM700 | 0.165           | 489                     | (001)         |
|       | 0.163           | 515                     | (101)         |
|       | 0.155           | 587                     | (110)         |

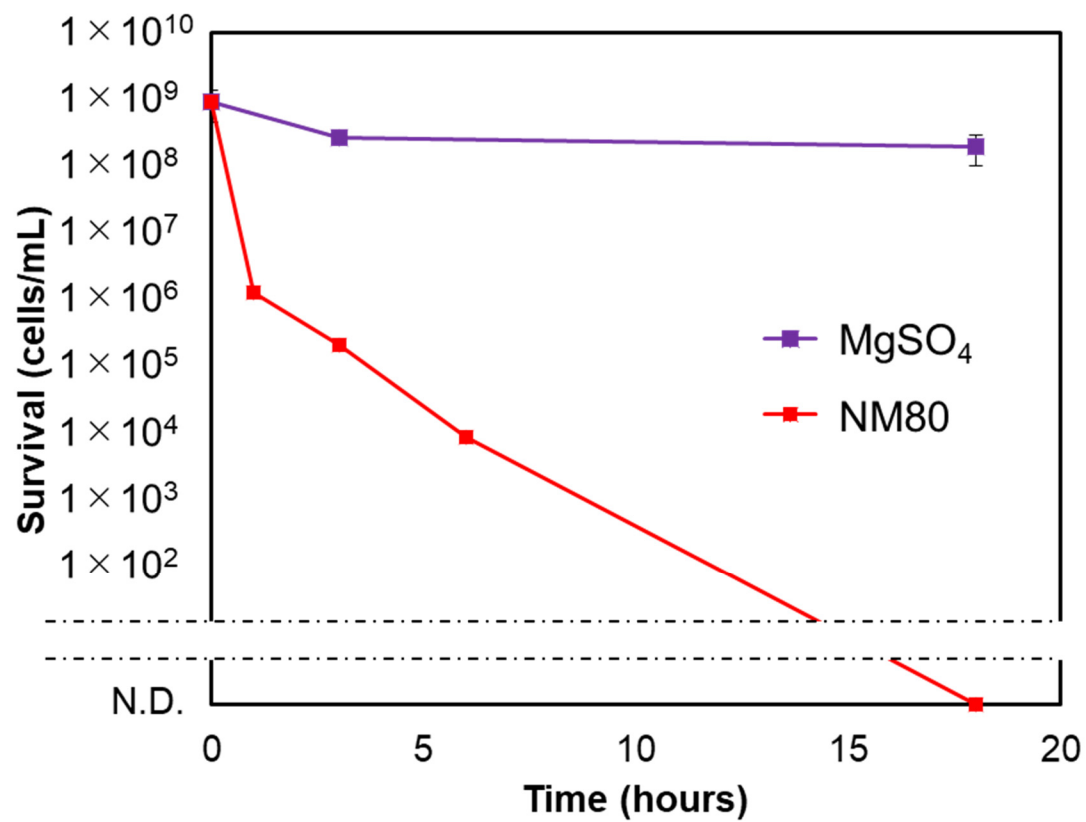

**Figure S1.** Bactericidal effects of MgSO<sub>4</sub> on *E. coli* at a concentration of 500 mg/l (purple line).

### (A) NM300

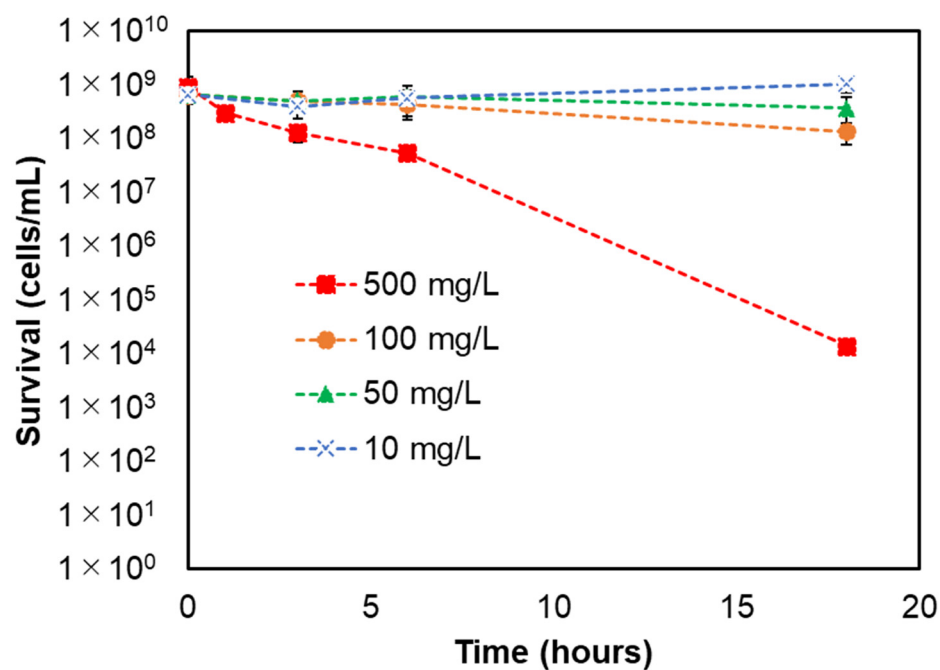

### (B) NM700

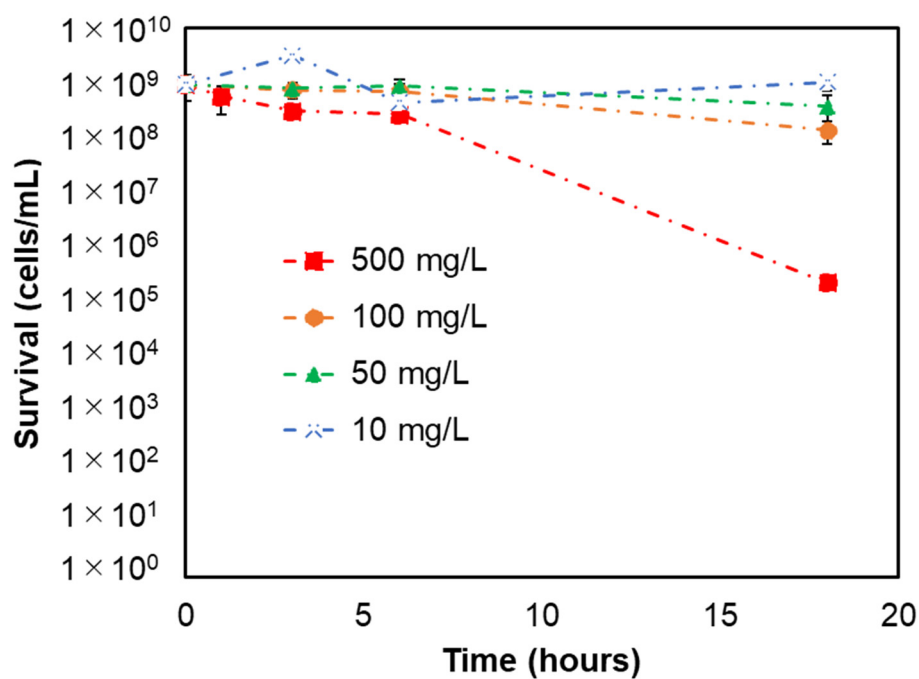

**Figure S2.** Bactericidal effect of NM300 (A) and NM700 (B) at different concentrations; 500 mg/l (red), 100 mg/l (orange), 50 mg/l (green), and 10 (blue) mg/l were examined for sterilizing *E. coli*.

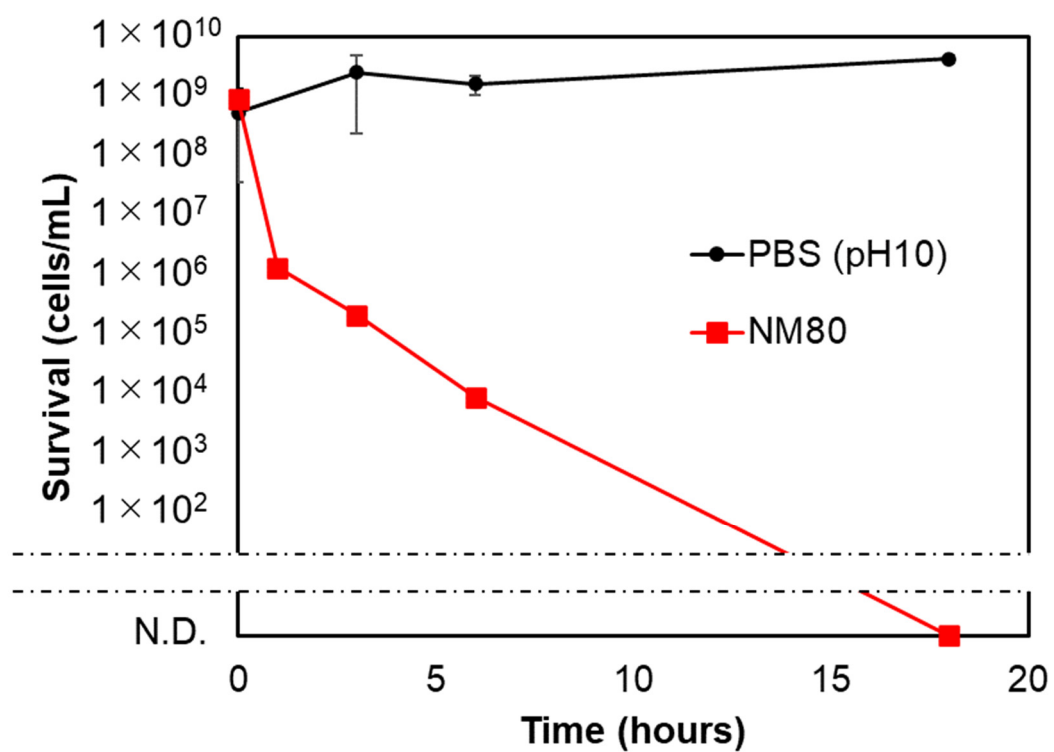

**Figure S3.** Bactericidal effects of PBS on *E. coli* at pH 10 (black line).

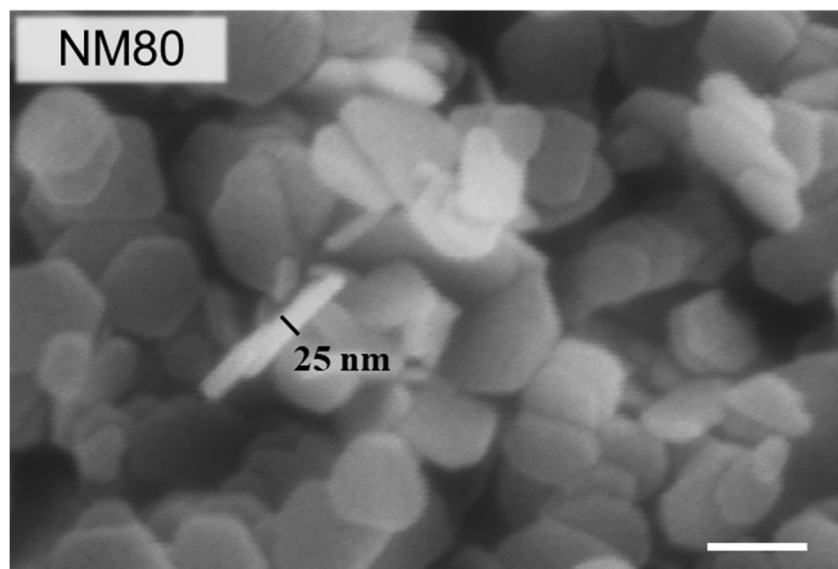

**Figure S4.** Magnified SEM images of NM80. Scale bar indicates 100  $\mu\text{m}$ . Black line indicates the thickness of NM80.
